# Supplementary material
Source: Elsevier journal article supplement (https://www.sciencedirect.com/science/article/pii/S0212656709002637)
Supplement: mmc1 [file S0212656709002637:mmc1.doc]

**Cuestionario para medir el grado de conocimiento del paciente sobre su medicamento.**

| **1.- ¿Para qué tiene que tomar/utilizar este medicamento?** | ns |
| --- | --- |
|  | |

| **2.- ¿Qué cantidad debe tomar/utilizar de este medicamento?** | ns |
| --- | --- |
|  | |

| **3.- ¿Cada cuánto tiene que tomar/utilizar este medicamento?** | ns |
| --- | --- |
|  | |

| **4.- ¿Hasta cuándo tiene que tomar/utilizar este medicamento?** | ns |
| --- | --- |
|  | |

| **5.- ¿Cómo debe tomar/utilizar este medicamento?** | ns |
| --- | --- |
|  | |

| **6.- ¿Ha de tener alguna precaución cuando toma/utiliza este medicamento?** | | | | | | |
| --- | --- | --- | --- | --- | --- | --- |
| Sí | **¿Cuál?** |  |  | No |  | ns |

| **7.- ¿Qué efectos adversos conoce usted de este medicamento?** | ns |
| --- | --- |
|  | |

| **8.- ¿Ante qué problema de salud o situación especial no debe tomar/utilizar este medicamento?** | ns |
| --- | --- |
|  | |

| **9.- ¿Cómo sabe si el medicamento le hace efecto?** | ns |
| --- | --- |
|  | |

| **10.- ¿Qué medicamentos o alimentos debe evitar tomar mientras use este medicamento?** | ns |
| --- | --- |
|  | |

| **11.- ¿Cómo debe conservar su medicamento?** | ns |
| --- | --- |
|  | |
